# Supplementary material for: Development and characterization of triazole-based WDR5 inhibitors for the treatment of glioblastoma
Source: JCI journal article supplement (doi:10.1172/jci.insight.198298), 2026-05-05

**Corresponding to Figure 4A. Green = WDR5, red = ACTN.**

*Bands; used in main text figure; top = C16, bottom = DMSO*

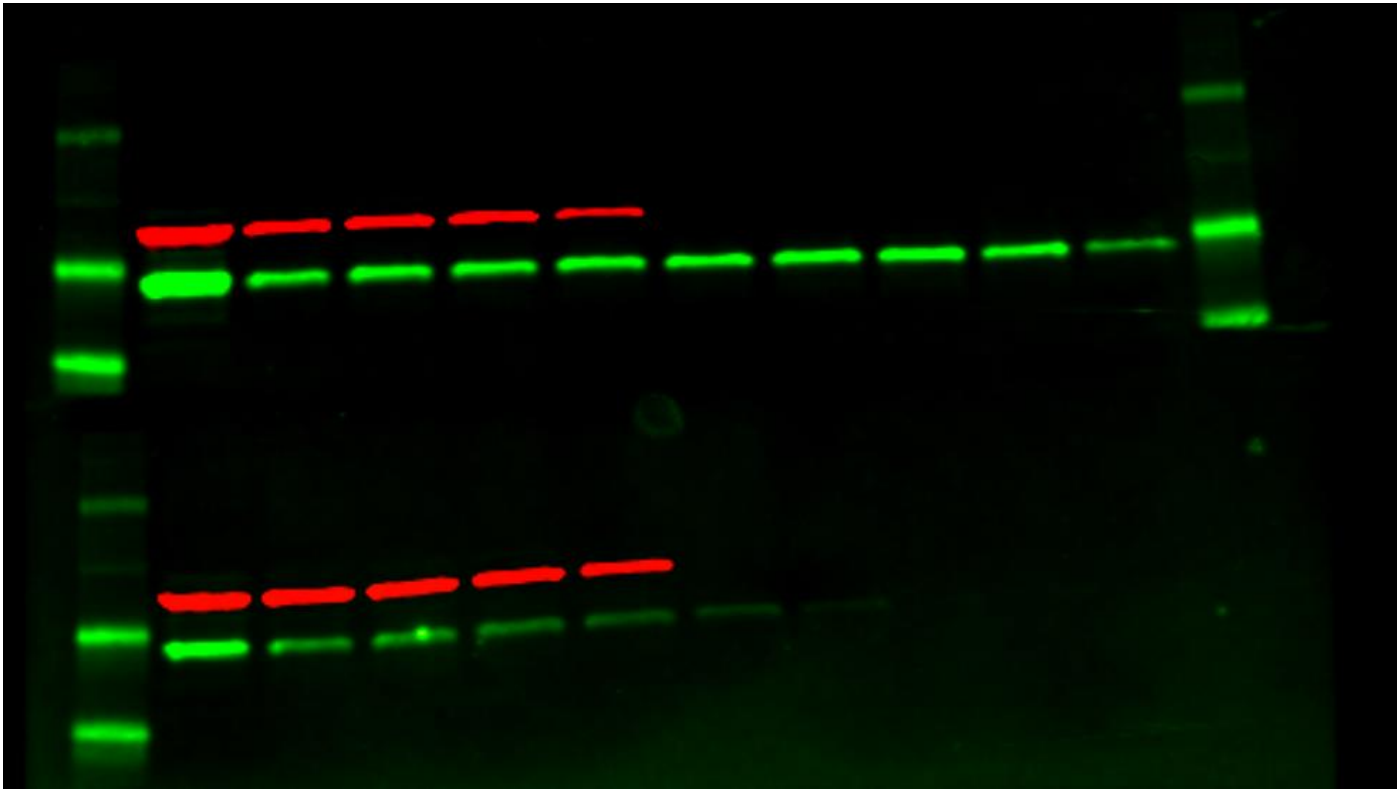

*overexposed, ladder fully visible, used to assign MW*

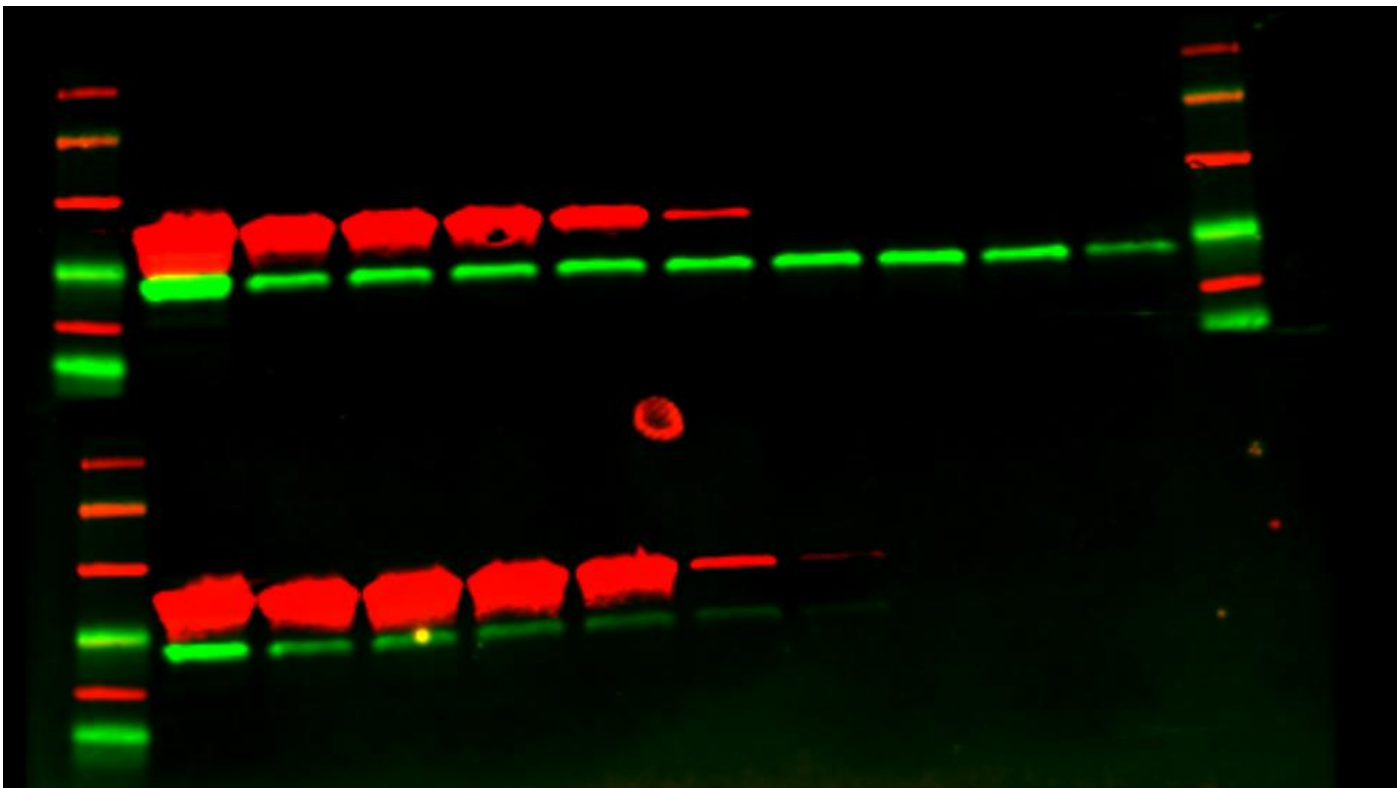

Corresponding to Figure 4B. Green = WDR5.

*Upper panel C3TD078*

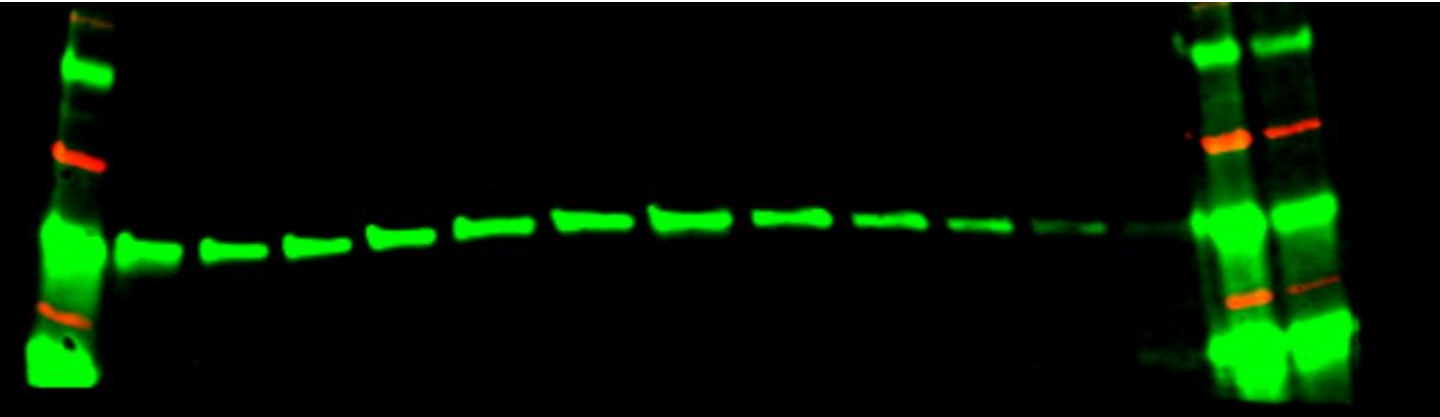

*Lower panel C3TD343*

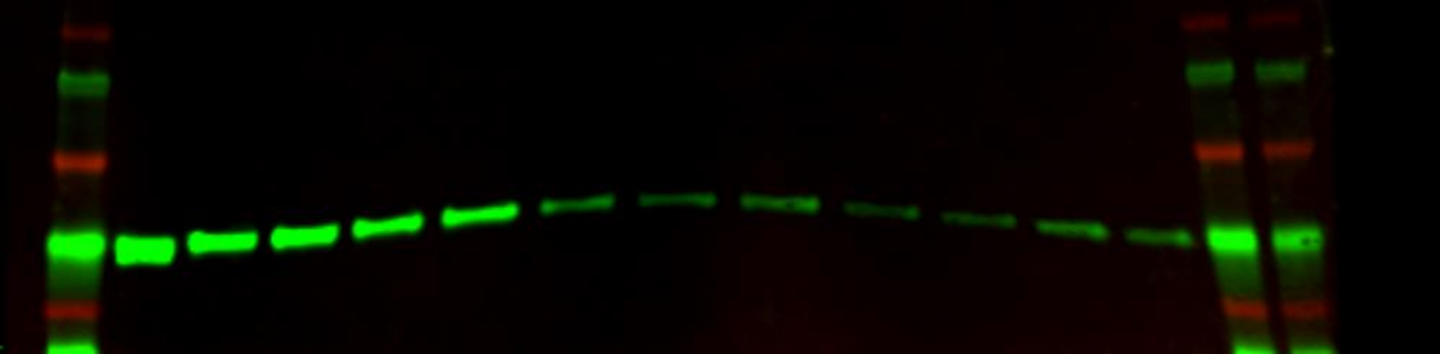

**Corresponding to Figure 4D. Green = WDR5, red = ACTN**

*Upper panel C3TD078, lower panel DMSO*

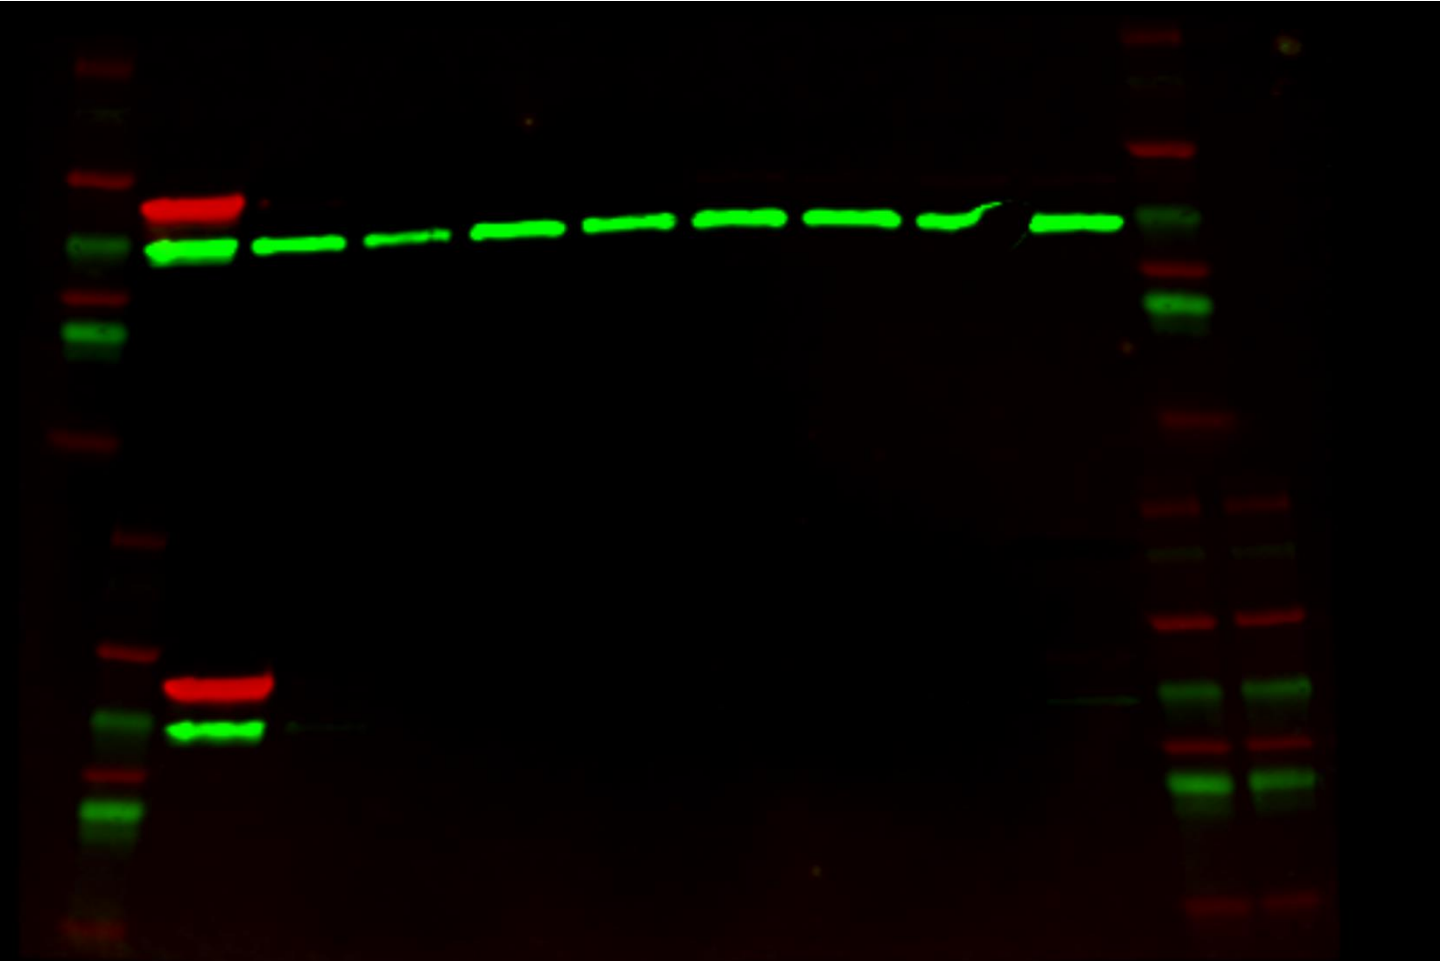

Supplement: sd1 [file 1]
